# Supplementary material for: Immunogenicity and therapeutic targeting of a public neoantigen derived from mutated PIK3CA
Source: PubMed Central journal article supplement (PMC9117146; doi:10.1038/s41591-022-01786-3), 2022-04-28
Supplement: 41591_2022_1786_MOESM1_ESM.pdf [file 41591_2022_1786_MOESM1_ESM.pdf]

**Supplementary information**

---

**Immunogenicity and therapeutic targeting  
of a public neoantigen derived from  
mutated *PIK3CA***

---

In the format provided by the  
authors and unedited

**Supplementary Fig. 1:** Negative and positive predictive capacity of the SIFT-seq discovery platform for Mut *PIK3CA*-specific TCRs.

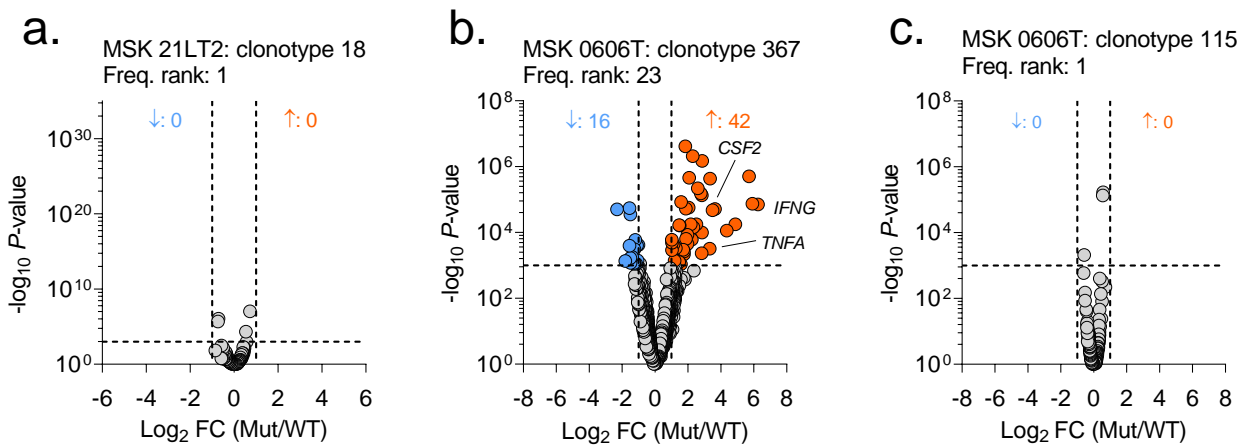

Volcano plots displaying global transcriptomic changes for (a) MSK 21LT2 clonotype 18 (non-reactive; frequency rank = 1), (b) MSK 0606T clonotype 367 (reactive; frequency rank = 23), and (c) MSK 0606T clonotype 115 (non-reactive; frequency rank = 1) following stimulation with Mut versus WT *PIK3CA*. Vertical and horizontal dashed lines indicate thresholds for gene expression  $\log_2$  fold-change (FC) and statistical significance, respectively. Orange and blue dots represent significantly up and down-regulated genes following Mut *PIK3CA* stimulation, respectively.

**Supplementary Fig. 2:** T cells transduced with TCRs retrieved from MSK 21LT2 clonotype 20 or MSK 0606T clonotype 367 generate a polyfunctional Mut *PIK3CA*-specific cytokine response.

**a.**

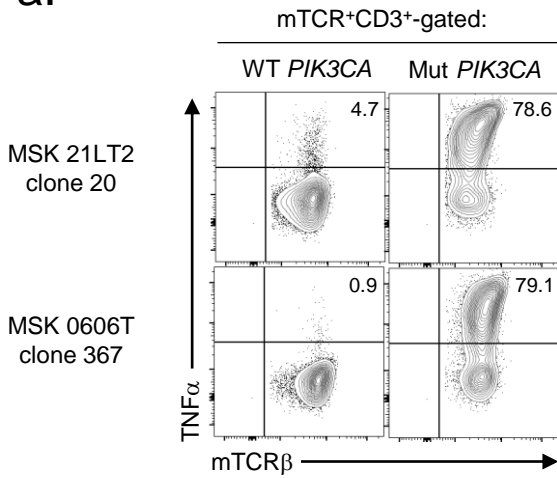

**c.**

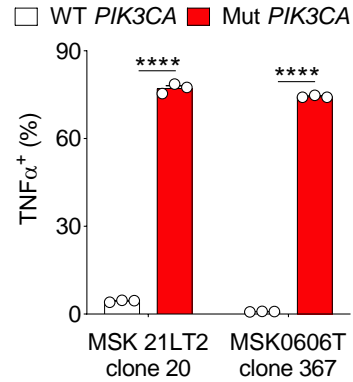

**b.**

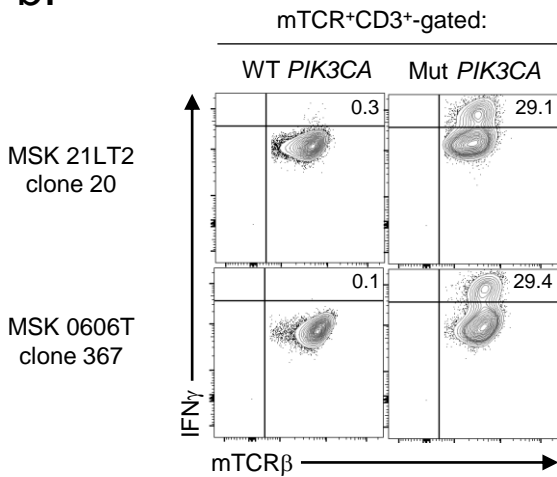

**d.**

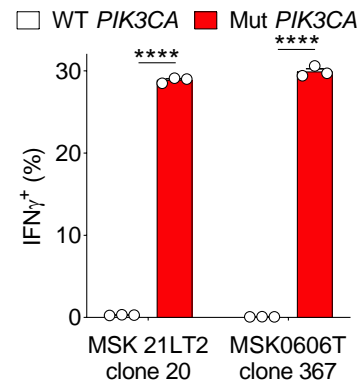

**e.**

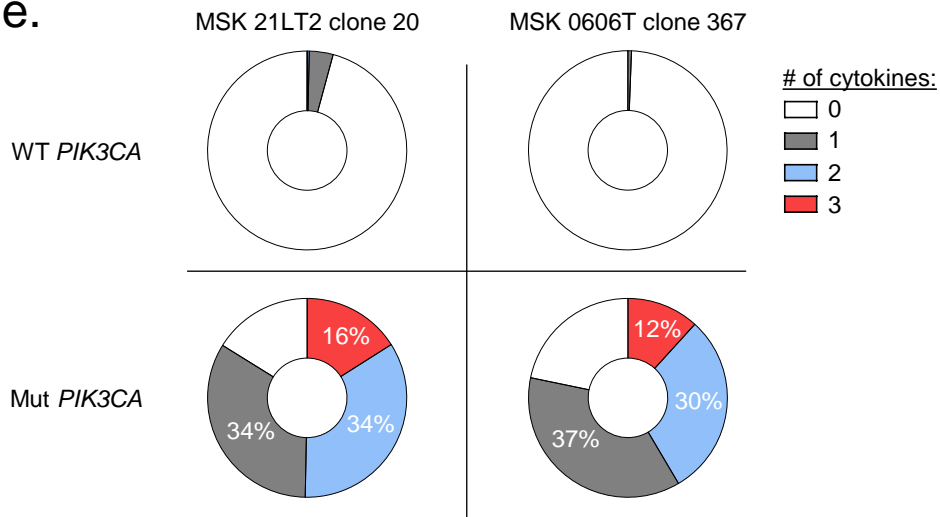

**Supplementary Fig. 2, continued:**

(a, b) Representative FACS plots, (c, d) summary bar graphs, and (e) polyfunctionality circus plot illustrating  $\text{TNF}\alpha$ ,  $\text{IFN}\gamma$ , and IL-2 production in T cells retrovirally transduced with SIFT-seq retrieved TCR gene sequences. A polyclonal population of T cells was transduced with either the TCR retrieved from MSK 21LT2 clonotype 20 or MSK 0606T clonotype 367. Transduced T cells were co-cultured with autologous monocyte derived DCs electroporated with mRNA encoding Mut or WT *PIK3CA*. Bar graphs displayed as mean  $\pm$  SEM using  $n=3$  biologic replicates per condition. \*\*\*\*  $P < 0.0001$  using a two-sided Student's t-test.

**Supplementary Fig. 3:** Normalization of the *IFNG* signal within candidate clonotypes under Mut versus WT stimulation conditions enhances the specificity of identifying mutation-reactive TCRs from MSK 21LT2.

**a. MSK 21LT2:**

Stimulation condition: ● = Mut *PIK3CA* ● = WT *PIK3CA*

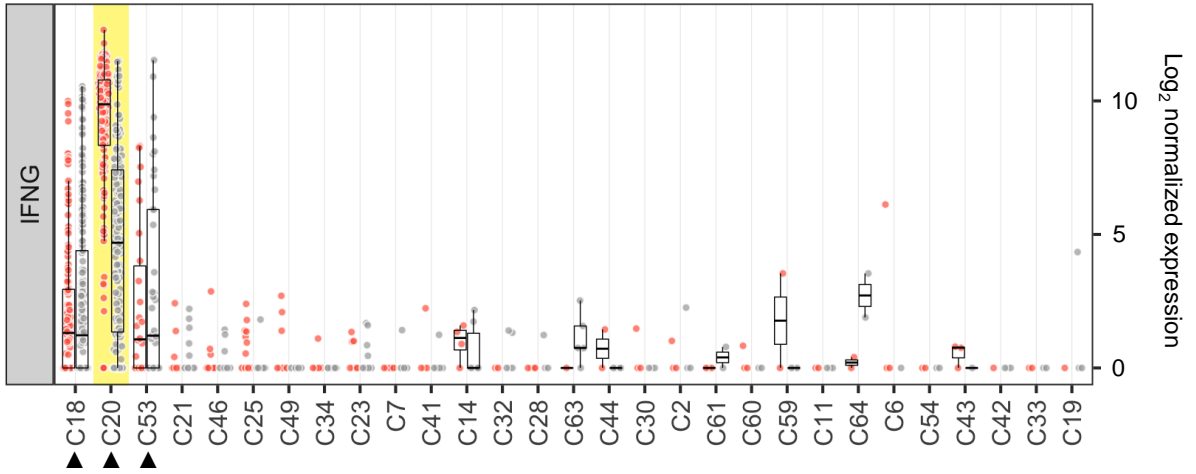

**b.**

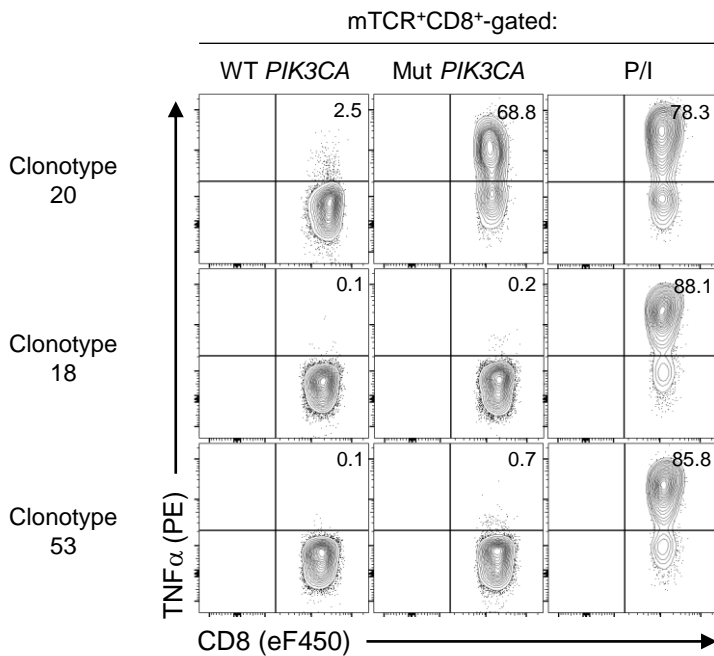

**c.**

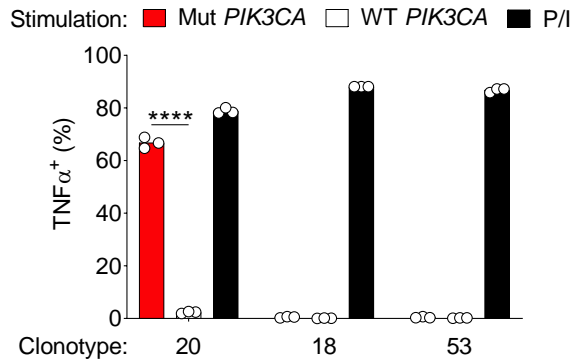

**Supplementary Fig. 3, continued:**

(a) Absolute values for *IFNG* transcripts from  $n=29$  unique TCR clonotypes identified using single-cell RNA and V(D)J TCR sequencing from screen positive “hit” well MSK 21LT2. Matched aliquots of sensitized T cells from healthy donor (HD) 1 were stimulated with *PIK3CA* (H1047L) (Mut) or wildtype *PIK3CA* (WT) prior to single-cell sequencing. The median (solid black line), upper quartile (top of box), lower quartile (bottom of box), and range (whiskers) for *IFNG* values from all evaluable TCR clonotypes under each stimulation condition is shown. Values from the SIFT-seq retrieved Mut *PIK3CA*-specific TCR clonotype 20 is highlighted in yellow; (▲) indicates clonotypes selected for TCR reconstruction and functional testing. (b) Representative FACS plots and (c) summary bar graphs ( $n=3$  biologic replicates per condition) displaying the frequency of intra-cellular  $\text{TNF}\alpha$  production in polyclonal T cells retrovirally transduced with TCR clonotypes 18, 20, and 53. All reconstructed TCRs express a murine constant chain (mTCR), enabling detection with an anti-mTCR-specific antibody. Transduced  $\text{CD8}^+$  T cells ( $\text{live}^+\text{mTCR}^+\text{CD8}^+$ ) were co-cultured with target cells co-expressing HLA-A\*03:01 and either WT or Mut *PIK3CA*. Stimulation by phorbol 12-myristate 13-acetate-ionomycin (P/I) was used as a TCR-independent positive control for T cell function. Bar graphs displayed as mean  $\pm$  SEM. \*\*\*\* $P < 0.0001$  using a two-sided Student’s t-test.

**Supplementary Fig. 4:** Normalization of the *IFNG* signal within candidate clonotypes under Mut versus WT stimulation conditions enhances the specificity of identifying mutation-reactive TCRs from MSK 0606T.

**a. MSK 0606:**  
Stimulation condition:  
● = Mut *PIK3CA* ● = WT *PIK3CA*

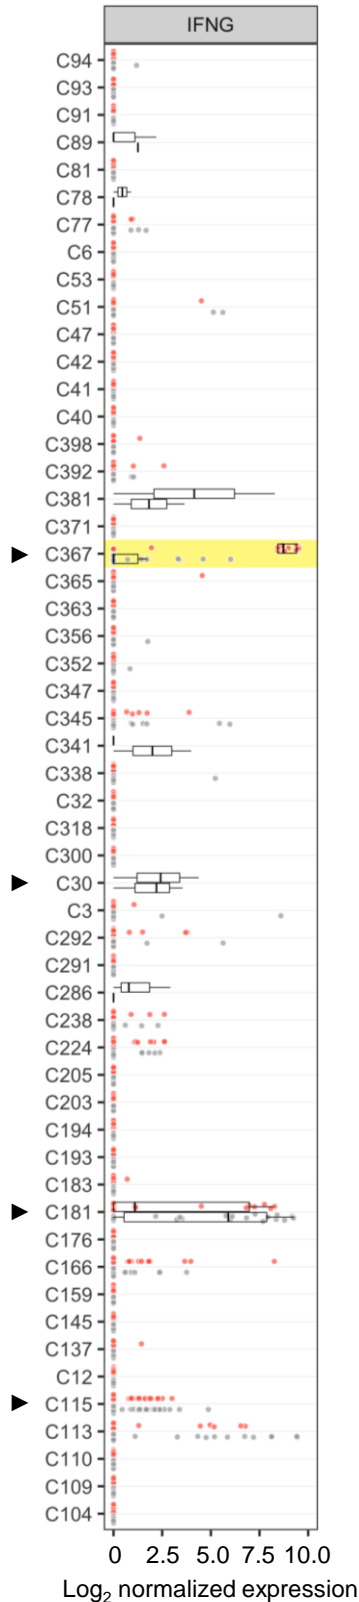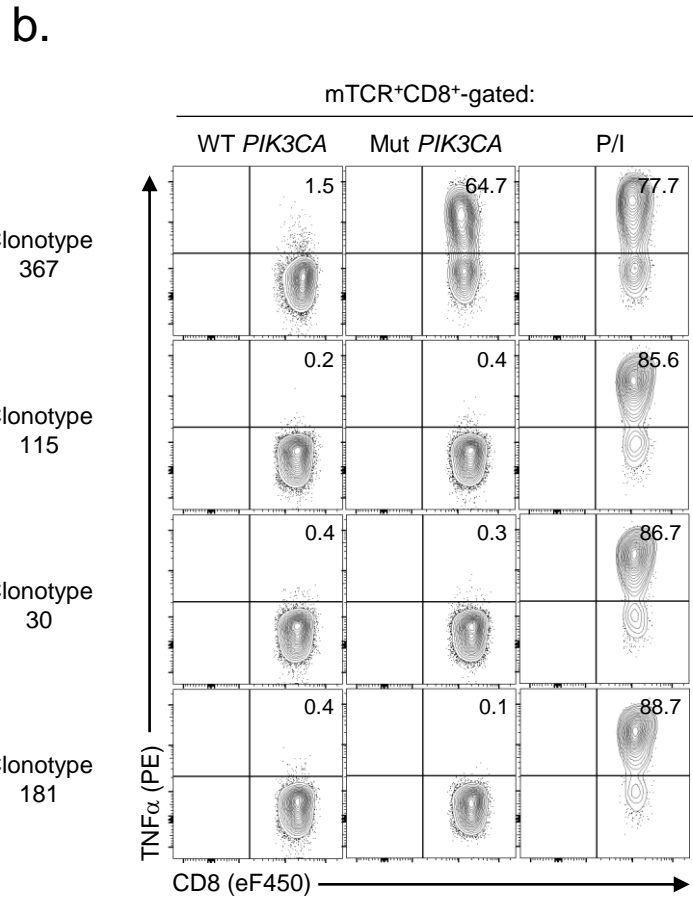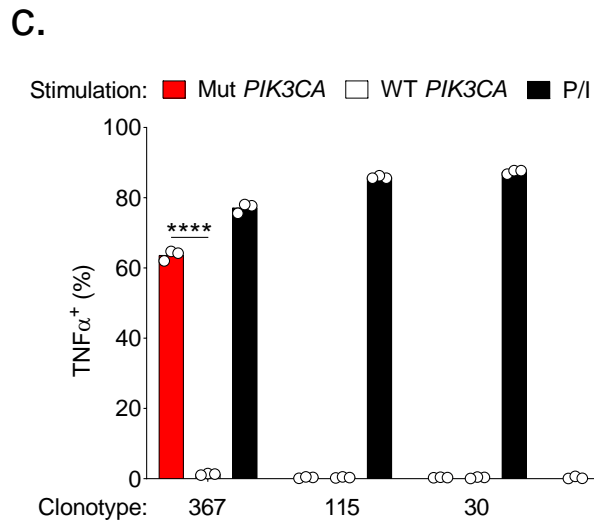

**Supplementary Fig. 4, continued:**

(a) Absolute values for *IFNG* transcripts from  $n=54$  unique TCR clonotypes identified using single-cell RNA and V(D)J TCR sequencing from screen positive “hit” well MSK 0606T. Matched aliquots of sensitized T cells from healthy donor (HD) 2 were stimulated with *PIK3CA* (H1047L) (Mut) or wildtype *PIK3CA* (WT) prior to single-cell sequencing. The median (solid black line), upper quartile (top of box), lower quartile (bottom of box), and range (whiskers) for *IFNG* values from all evaluable TCR clonotypes under each stimulation condition is shown. Values from the SIFT-seq retrieved Mut *PIK3CA*-specific TCR clonotype 367 is highlighted in yellow; (▲) indicates clonotypes selected for TCR reconstruction and functional testing. (b) Representative FACS plots and (c) summary bar graphs ( $n=3$  biologic replicates per condition) displaying the frequency of intra-cellular  $\text{TNF}\alpha$  production in polyclonal T cells retrovirally transduced with TCR clonotypes 30, 115, 181, and 367. All reconstructed TCRs express a murine constant chain (mTCR), enabling detection with an anti-mTCR-specific antibody. Transduced  $\text{CD8}^+$  T cells ( $\text{live}^+\text{mTCR}^+\text{CD8}^+$ ) were co-cultured with target cells co-expressing HLA-A\*03:01 and either WT or Mut *PIK3CA*. Stimulation by phorbol 12-myristate 13-acetate-ionomycin (P/I) was used as a TCR-independent positive control for T cell function. Bar graphs displayed as mean  $\pm$  SEM. \*\*\*\* $P < 0.0001$  using a two-sided Student’s t-test.



**Supplementary Fig. 5:** Comparison of mutation-specific effector functions for a panel of *PIK3CA* public neoantigen TCRs.

a.

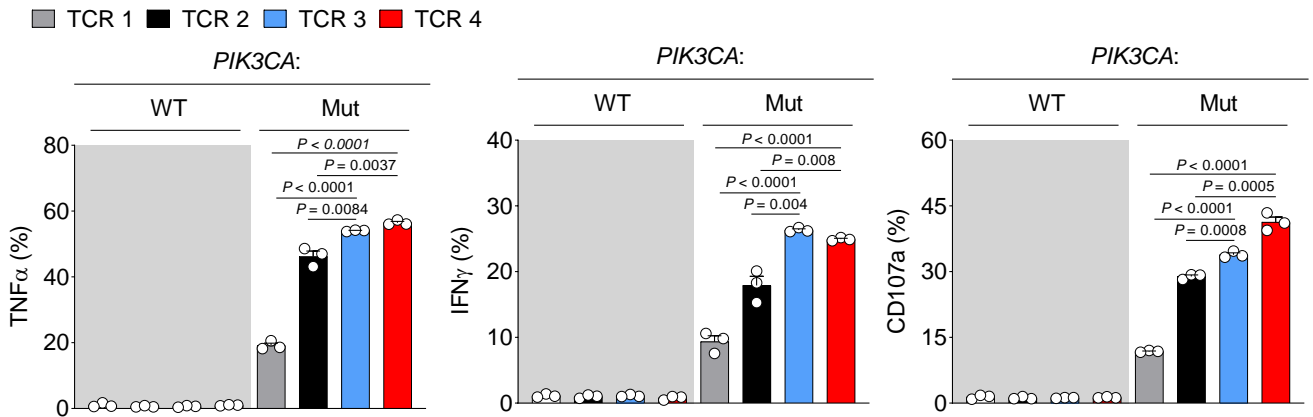

b.

| TCR ID | EC <sub>50</sub> CD8 <sup>+</sup> ( $\mu$ M) | EC <sub>50</sub> CD4 <sup>+</sup> ( $\mu$ M) |
|--------|----------------------------------------------|----------------------------------------------|
| TCR1   | 169                                          | -                                            |
| TCR2   | 0.268                                        | -                                            |
| TCR3   | 0.029                                        | 0.489                                        |
| TCR4   | 0.026                                        | 0.769                                        |

(a) Summary bar graphs demonstrating Mut-specific expression of multiple effector molecules by T cells transduced with a *PIK3CA* public NeoAg TCR. Polyclonal CD8<sup>+</sup> T cells were individually transduced with *PIK3CA* public NeoAg TCR panel members 1-4 and cocultured with HLA-A\*03:01<sup>+</sup> target cells that express either WT or Mut *PIK3CA*. Numbers in each bar graph indicate the frequency of T cells producing TNF $\alpha$ , IFN $\gamma$ , or CD107a measured by FACS analysis after pre-gating on live<sup>+</sup>mTCR<sup>+</sup>CD8<sup>+</sup> cells. Bar graphs are displayed as mean  $\pm$  SEM using  $n=3$  biologic replicates per condition. Exact  $P$  values are displayed above each comparison and were calculated using a two-sided Student's t-test.

(b) Mean effective concentration of Mut *PIK3CA* required to trigger half-maximal (EC<sub>50</sub>) TNF $\alpha$  production in enriched CD8<sup>+</sup> or CD4<sup>+</sup> T cells transduced with a *PIK3CA* public NeoAg TCR. CD8<sup>+</sup> or CD4<sup>+</sup> T cells were individually transduced with *PIK3CA* public NeoAg TCRs 1-4. Transduced T cells were co-cultured with an HLA-I mono-allelic cell line expressing HLA-A\*03:01 and electroporated with defined concentrations of Mut *PIK3CA* mRNA. All data shown is representative of  $n=2$  independent experiments.

**Supplementary Fig. 6:** An immuno-peptidomic screen for endogenously processed and HLA-A\*03:01 presented peptides derived from wildtype *PIK3CA*.

a.

| ID                                 | PI3K $\alpha$ amino acid sequences | NetMHC predicted 9mer peptides | Mass-spec identified 9mer peptides |
|------------------------------------|------------------------------------|--------------------------------|------------------------------------|
| Full-length <i>PIK3CA</i> (H1047L) | 1-1068                             | 16                             | 2                                  |
| WT <i>PIK3CA</i> minigene 1        | 1-373                              | 8                              | 3                                  |
| WT <i>PIK3CA</i> minigene 2        | 349-721                            | 7                              | 0                                  |
| WT <i>PIK3CA</i> minigene 3A       | 697-1068                           | 0                              | 0                                  |
| <i>PIK3CA</i> (H1047L) minigene 3B | 697-1068                           | 1                              | 1                                  |

b.

Mass-spec detected (+/-):

|                   | NetMHC predicted epitope | E.L. % rank | B.A. (nM) | Mini-gene | Full-length |
|-------------------|--------------------------|-------------|-----------|-----------|-------------|
| 1.                | ITIKHELFK                | 0.11        | 27.4      | -         | -           |
| 2.                | KVIEPVGNR                | 0.09        | 174.7     | +         | -           |
| 3.                | QVIAEAIK                 | 0.41        | 513.4     | -         | -           |
| 4.                | VIAEAIK                  | 0.08        | 115.1     | +         | +           |
| 5.                | MLLSSEQLK                | 0.33        | 66.0      | -         | -           |
| 6.                | YMNGETSTK                | 0.38        | 197.6     | +         | -           |
| 7.                | VINSALRIK                | 0.16        | 75.2      | -         | -           |
| 8.                | KIYVRTGIY                | 0.31        | 29.3      | -         | -           |
| 9.                | GVTGSPNK                 | 0.38        | 469.7     | -         | -           |
| 10.               | VTIPEILPK                | 0.05        | 79.3      | -         | -           |
| 11.               | LVKDWPIK                 | 0.28        | 375.0     | -         | -           |
| 12.               | NLLVRFLK                 | 0.44        | 44.3      | -         | -           |
| 13.               | LLVRFLK                  | 0.22        | 34.4      | -         | -           |
| 14.               | HLKSEMHNK                | 0.13        | 105.3     | -         | -           |
| 15.               | GMYLKHLNR                | 0.29        | 85.5      | -         | -           |
| 16.               | ALHGGWTTK                | 0.03        | 35.3      | +         | +           |
| Wild-type control | AHGGWTTK                 | 4.012       | 9840.7    | -         | -           |

Relative value

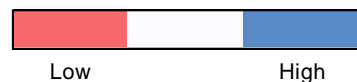

**Supplementary Fig. 6, continued:**

(a) Table listing the full-length and minigene *PIK3CA* constructs tested, the total number of high-affinity nine amino acid peptides (9mers) predicted by NetMHCpan 4.1 to bind to HLA-A\*03:01, and the number of HLA immunoprecipitation/liquid chromatography tandem mass-spectrometry (HLA-IP/MS) detected peptides. Strong HLA binding was defined as an eluted ligand (E.L.) % rank of <0.5% and/or peptide binding affinity (B.A.) <500 nM. (b) Summary table listing the identity of 9mer peptide sequences predicted to bind with high-affinity to HLA-A\*03:01, the peptide's corresponding NetMHCpan 4.1 predicted E.L. % rank and B.A., and whether the peptide was detected by HLA-IP/MS. Heat map color indicates either the relative value for the NetMHCpan 4.1 prediction (red = low, blue = high) or whether a peptide sequence was detected by HLA-IP/MS (red = yes, blue = no).

**Supplementary Fig. 7:** Structural details and comparisons of the PI3K $\alpha$  pMut and pWT peptides bound to HLA-A\*03:01.

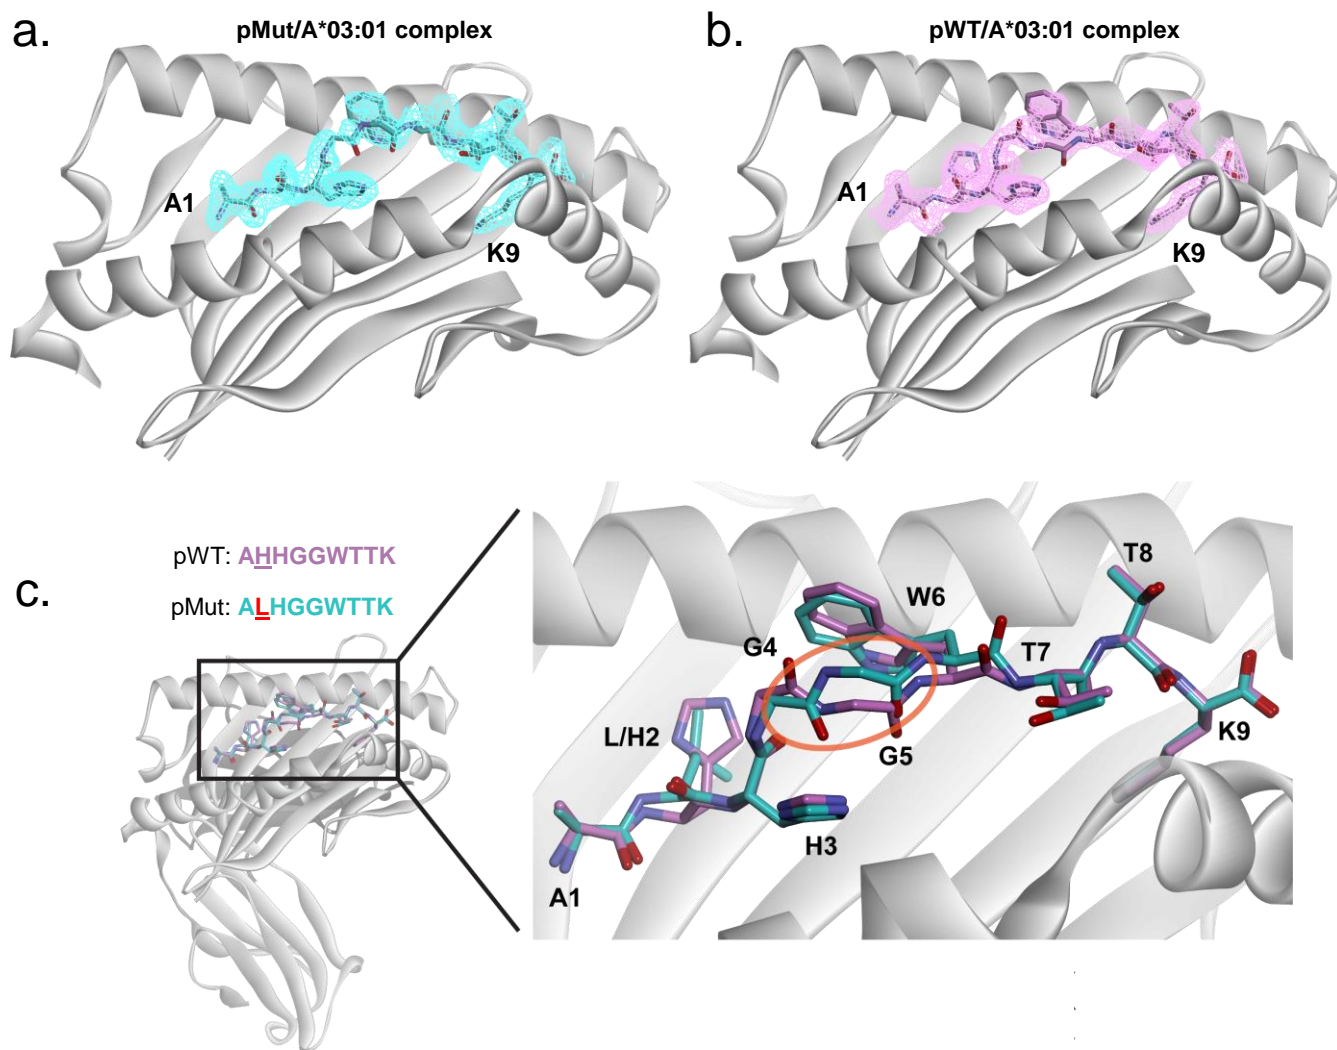

Electron density of the (a) pMut and (b) pWT peptides in the HLA-A:03:01 binding groove with  $2F_o - F_c$  contoured at  $1\sigma$ . (c) Comparison of the peptide conformations in the binding grooves. A small structural divergence is present at the backbone at P4 and P5 Gly residues but does not alter overall peptide conformation or amino acid side chains positions.

**Supplementary Fig. 8:** Measurement of the thermal stability of a *PIK3CA* public neopeptide or its wildtype counterpart bound to HLA-A\*03:02 using differential scanning fluorimetry.

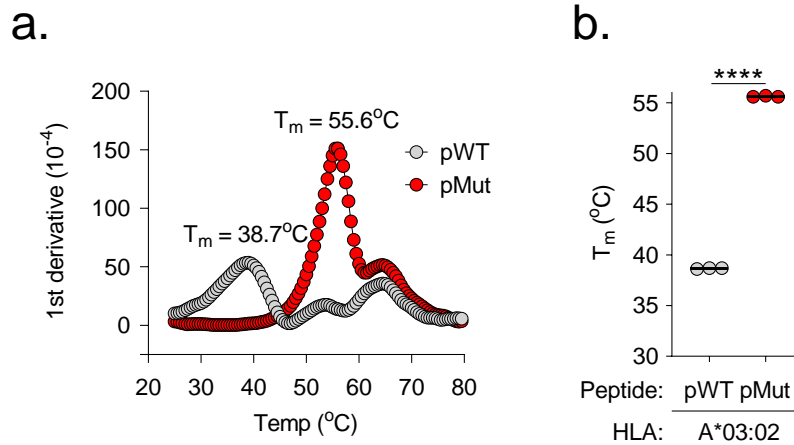

(a) Representative thermal melt curves and (b) summary scatter plot displaying the melting temperatures ( $T_m$ ) of the pMut and wild type peptide (pWT) / HLA-A\*03:02 complexes using differential scanning fluorimetry. Symbols are displayed as mean  $\pm$  SEM using  $n=3$  technical replicates. \*\*\*\* $P \leq 0.0001$  using a two-sided Student's t-test.

**Supplementary Fig. 9:** Comparison of the *in vitro* function of CD8<sup>+</sup> T cells transduced with TCR4 or an HLA-A\*03:01-restricted influenza control TCR.

a.

| Antigen class     | Antigen                | Restricting HLA allele | Minimal epitope           | Peptide length | B.A. (nM) |
|-------------------|------------------------|------------------------|---------------------------|----------------|-----------|
| Public neoantigen | PI3K $\alpha$ (H1047L) | A*03:01                | ALHG $\underline{G}$ WTTK | 9              | 35.3      |
| Self antigen      | PI3K $\alpha$          | A*03:01                | AHHGGWTTK                 | 9              | 9840.7    |
| Viral antigen     | Influenza NP           | A*03:01                | ILRGSVAHK                 | 9              | 28.4      |

b.

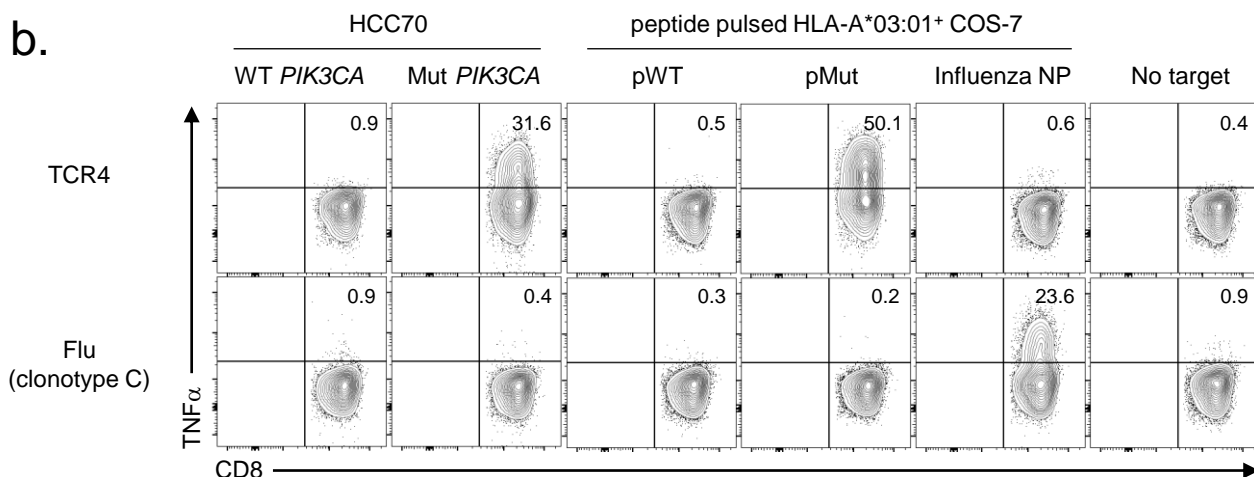

c.

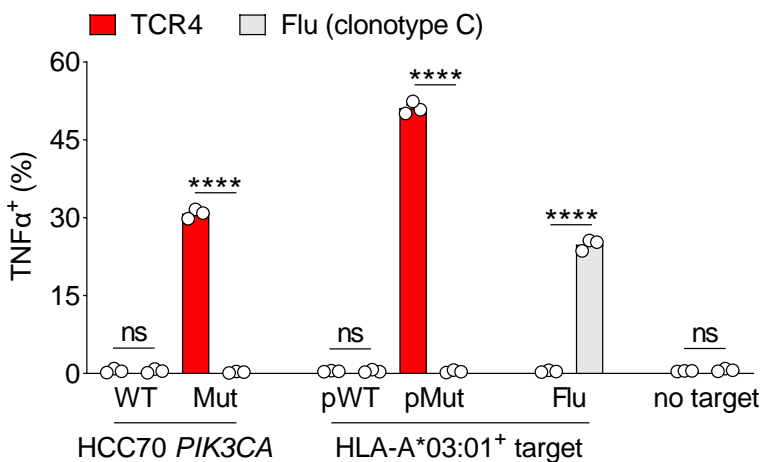

**Supplementary Fig. 9, continued:**

(a) Table comparing the biophysical features of the PI3K $\alpha$  pMut, PI3K $\alpha$  pWT, or an influenza nucleoprotein (Flu) control peptide. Predicted binding affinity (B.A.) based on NetMHCpan 4.1. **X** = preferred HLA-I anchor residue. (b) Representative FACS plots and (c) summary bar graph of intracellular TNF $\alpha$  production by CD8<sup>+</sup> T cells transduced with TCR4 or a Flu-specific control TCR (clonotype C). T cells were cocultured with HCC70-WT *PIK3CA*, HCC70-Mut *PIK3CA*, or HLA-A\*03:01<sup>+</sup> COS-7 cells pulsed with 1 $\mu$ M of the indicated peptides. Numbers within each plot indicate the frequency of TNF $\alpha$  producing TCR transduced CD8<sup>+</sup> T cells after pre-gating on live<sup>+</sup>mTCR<sup>+</sup> T cells. Results shown as mean  $\pm$  SEM using  $n=3$  biologic replicates per condition. \*\*\*\* $P < 0.0001$  and ns = not significant using a two-sided Student's t-test with Bonferroni correction.

**Supplementary Fig. 10:** Individual tumor growth curves for mice receiving adoptively transferred T cells genetically engineered with a *PIK3CA* public NeoAg-specific TCR, Flu-specific TCR, or phospho-buffered saline.

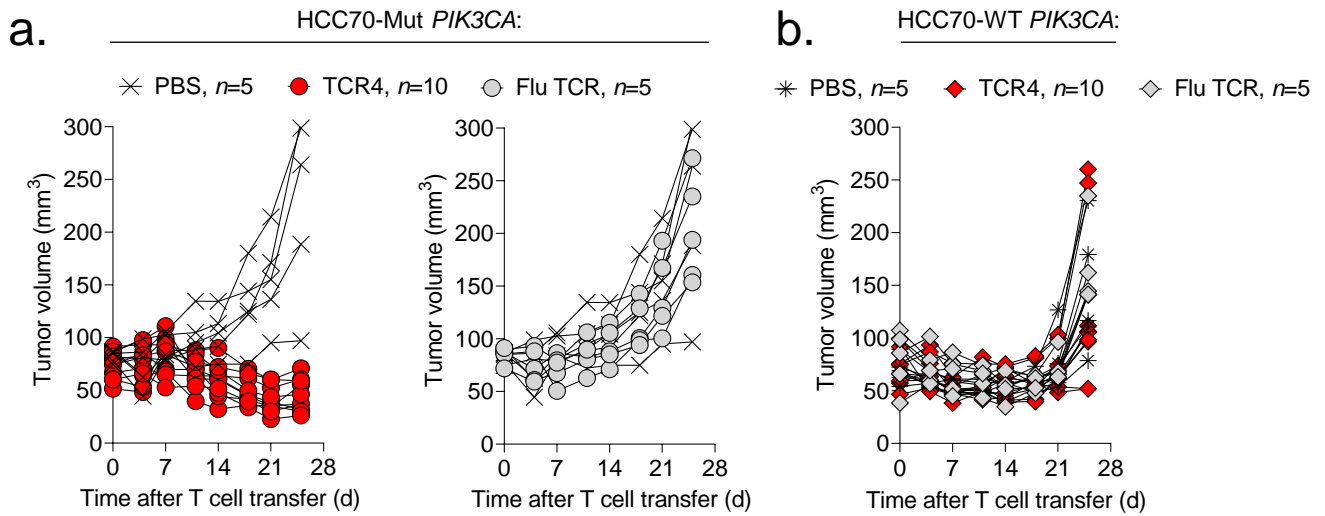

Tumor growth kinetics from individual mice in the experiment displayed in **Fig. 5b** and **Fig. 5d**. Mice implanted with either (a) HCC70-Mut *PIK3CA* tumors or (b) HCC70-WT *PIK3CA* tumors received twice weekly intraperitoneal injections of  $1\ \mu\text{g}$  of IL-15 pre-complexed with IL-15R $\alpha$ -Fc (1:1M) in addition to intravenous injection of either CD8<sup>+</sup> T cells transduced with TCR4, CD8<sup>+</sup> T cells transduced with an influenza (Flu)-specific TCR, or phosphate-buffered saline (PBS).  $7.5e^6$  and  $2.5e^6$  TCR<sup>+</sup> T cells were administered on D0 and D3 after randomization. TCR4  $n=10$ , Flu TCR  $n=5$ , PBS  $n=5$ .



**Supplementary Fig. 11:** Adoptive transfer of TCR4-transduced T cells does not cause significant changes in the weights of mice bearing established Mut or WT *PIK3CA* expressing tumors compared with control treated mice.

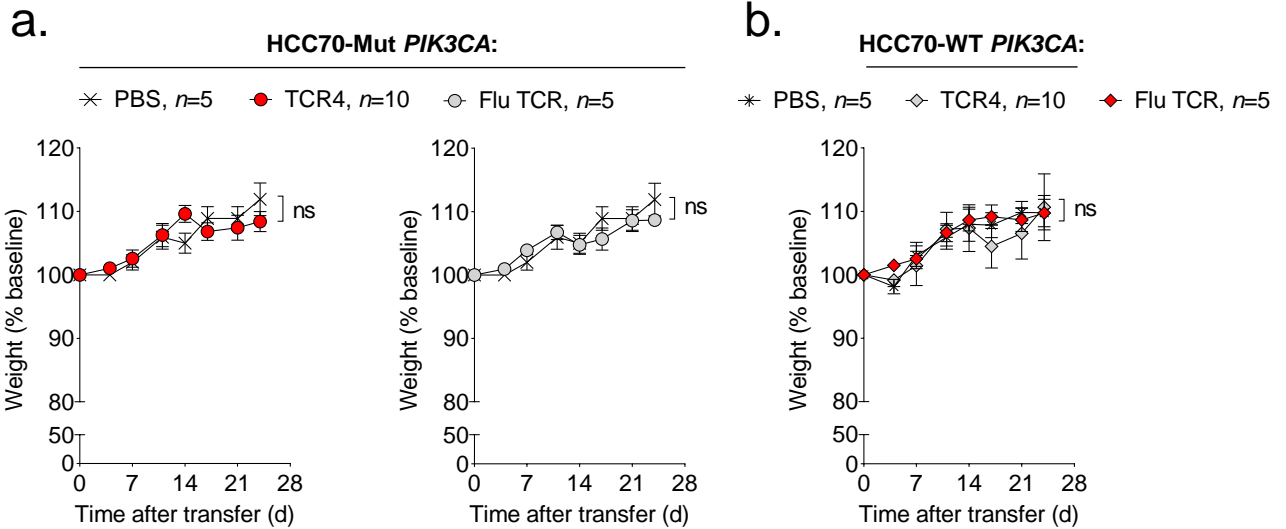

Mice were randomized between indicated treatment groups once subcutaneously implanted HCC70-Mut *PIK3CA* or HCC70-WT *PIK3CA* tumors were established to  $\sim 75\text{mm}^3$ . All mice received a twice weekly intraperitoneal injection of  $1\mu\text{g}$  of IL-15 precomplexed to IL-15R $\alpha$ -Fc (1:1M) and intravenous injection of either phosphate-buffered saline (PBS), CD8<sup>+</sup> T cells transduced with an influenza (Flu)-specific TCR, or CD8<sup>+</sup> T cells transduced with TCR4. Mice received  $7.5 \times 10^6$  and  $2.5 \times 10^6$  TCR<sup>+</sup> T cells on D0 and D3 after randomization. Changes in the weights of mice bearing (a) HCC70-Mut *PIK3CA* or (b) HCC70-WT *PIK3CA* tumors following treatment. Weights are normalized to the day of randomization. Data shown as mean  $\pm$  SEM and is representative of two independently performed experiments; TCR4  $n=10$ , Flu TCR  $n=5$ , PBS  $n=5$ . ns = not significant using a two-way ANOVA test.

**Supplementary Fig. 12:** Application of the MSK-IMPACT clinical next-gen sequencing (NGS) platform for the efficient identification of *PIK3CA* public NeoAg-expressing cancer patients.

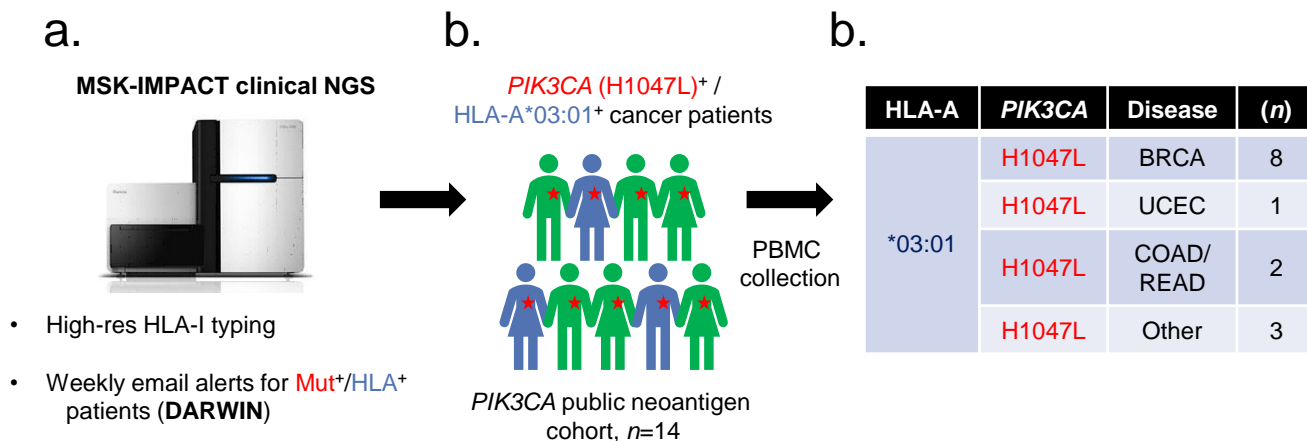

(a) MSK-IMPACT is a CLIA-certified clinical NGS platform capable of performing high resolution HLA-I calls. Using DARWIN, an automated genotype enrollment tool, patients who have a *PIK3CA* (H1047L) (Mut<sup>+</sup>) cancer and are HLA-A\*03:01 (HLA<sup>+</sup>) were flagged for biospecimen collection using an IRB approved protocol. (b) Using this approach, a biotrust of viable peripheral blood mononuclear cells (PBMCs) from a cohort of *n*=14 cancer patients with diverse malignancies who express an identical *PIK3CA* public neoantigen (NeoAg) was collected. (c) Summary table of *PIK3CA* public NeoAg expressing cancer types analyzed in this cohort.

**Supplementary Fig. 13:** Representative gating strategy to determine NeoAg-specific cytokine production by TCR-transduced T cells.

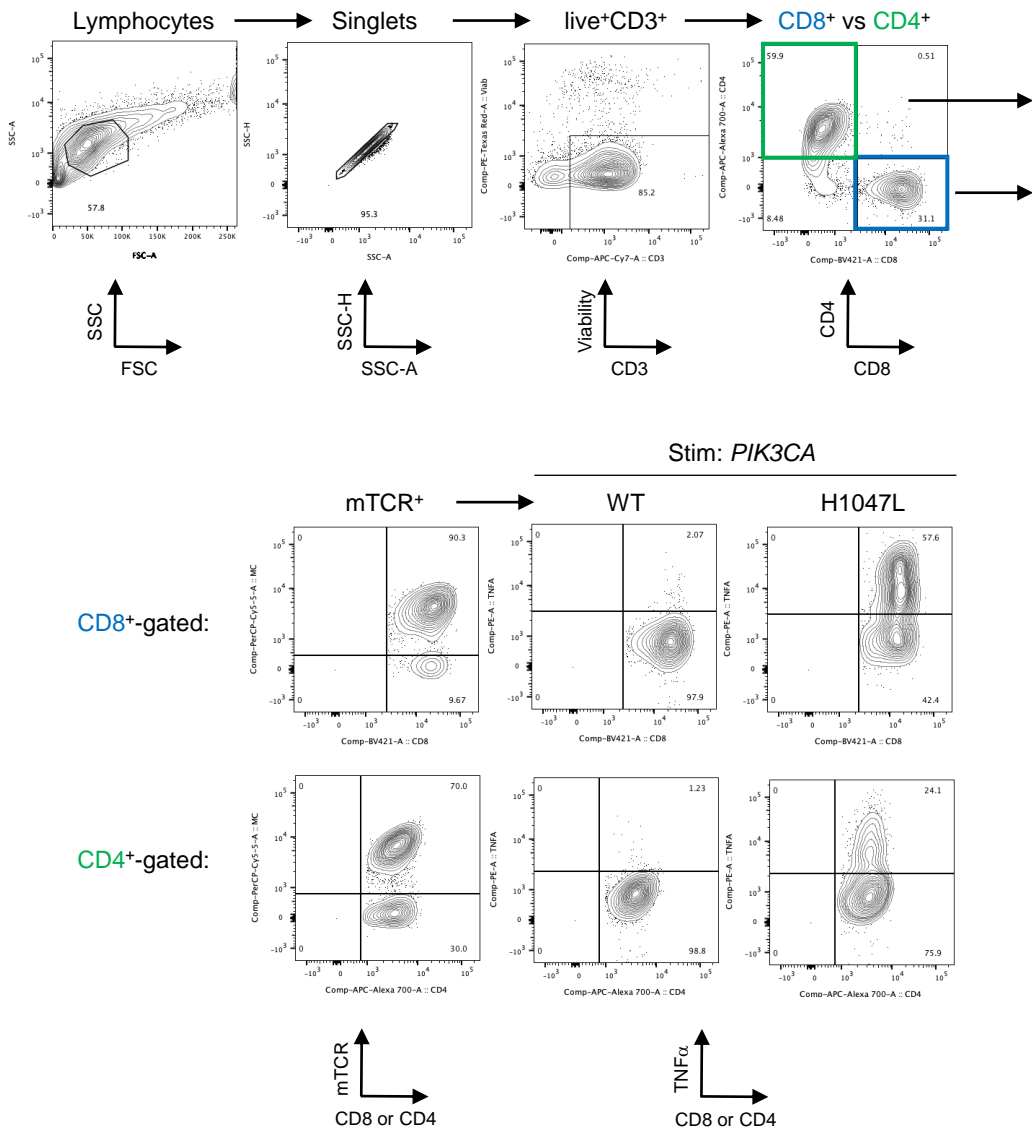

Gating hierarchies and staining results for cytokine production by polyclonal CD4<sup>+</sup> and CD8<sup>+</sup> T cells transduced with a murinized T cell receptor following stimulation with wildtype or mutant *PIK3CA*.

**Supplementary Fig. 14:** Representative gating strategy to assess *PIK3CA* public NeoAg-specific T cells in patient peripheral blood following CD8-enrichment.

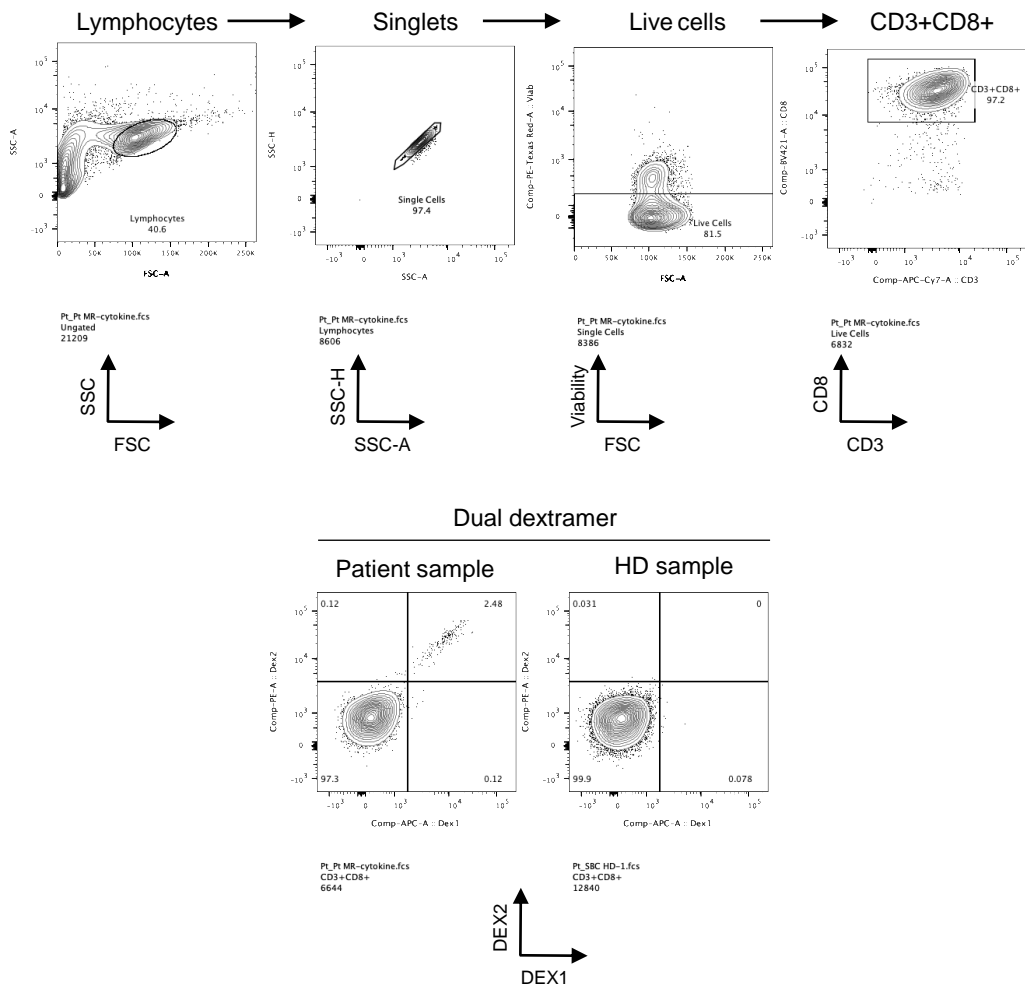

Gating hierarchies and staining results for dual-color HLA-A\*03:01 dextramers loaded with the ALHGGWTTK neopeptide on peripheral blood-derived CD8<sup>+</sup> T cells.

**Supplementary Fig. 15:** Representative gating strategy to determine HLA expression on an explanted patient-derived xenograft.

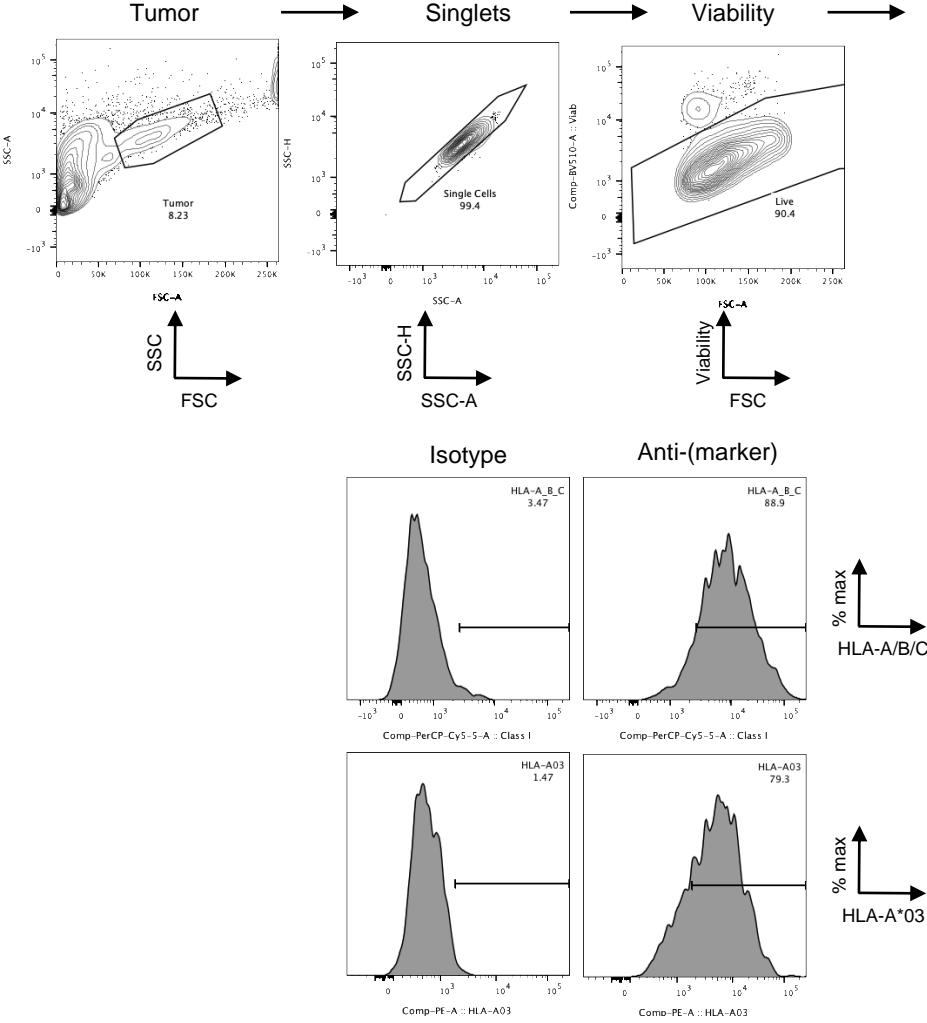

Gating hierarchies and staining results for HLA-I and HLA-A\*03 on a single-cell suspension derived from explanted PDX USC\_X10.

**Supplementary Table 1:** High-resolution HLA-A and HLA-DRB1 haplotyping of SIFT-seq screened healthy donors (HDs).

| Subject ID | HLA-A, allele 1 | HLA-A, allele 2 | HLA-DRB1, allele 1 | HLA-DRB1, allele 2 |
|------------|-----------------|-----------------|--------------------|--------------------|
| HD1        | *03:01:01       | *69:01:01       | *01:01:01          | *13:02:01          |
| HD2        | *01:01:01       | *03:01:01       | *11:04:01          | *15:01:01          |
| HD3        | *03:01:01       | *29:02:01       | *07:01:01          | *07:01:01          |
| HD4        | *01:01:01       | *03:01:01       | *07:01:01          | *15:01:01          |

**Supplementary Table 2:** X-ray data collection and refinement statistics for the pWT and pMut / HLA-A\*03:01 (A\*03:01) complexes and the complexes of pMut / A\*03:01 with TCR3 or TCR4.

|                                                     | pWT/A*03:01            | pMut/A*03:01           | TCR3-pMut/A*03:01      | TCR4-pMut/A*03:01      |
|-----------------------------------------------------|------------------------|------------------------|------------------------|------------------------|
| <b>Data Collection</b>                              |                        |                        |                        |                        |
| Space group                                         | P 6 2 2                | P 6 2 2                | C 1 2 1                | P 4 3 2 1 2            |
| Unit cell dimensions                                |                        |                        |                        |                        |
| <i>a</i> , <i>b</i> , <i>c</i> (Å)                  | 156.59, 156.59, 86.21  | 155.72, 155.72, 85.66  | 227.27, 46.25, 120.26  | 72.28, 72.28, 475.73   |
| $\alpha$ , $\beta$ , $\gamma$ (°)                   | 90, 90, 120            | 90, 90, 120            | 90, 118.67, 90         | 90, 90, 90             |
| Resolution (Å)                                      | 50.00-2.05 (2.09-2.05) | 50.00-1.96 (1.99-1.96) | 50.00-2.12 (2.16-2.12) | 50.00-3.11 (3.15-3.11) |
| <i>R</i> <sub>merge</sub>                           | 0.110 (0.598)          | 0.123 (0.918)          | 0.111 (0.614)          | 0.145 (1.365)          |
| <i>I</i> / $\sigma$ <i>I</i>                        | 33.7 (2.5)             | 29.3 (2.6)             | 17.9 (2.1)             | 25.0 (2.0)             |
| Completeness (%)                                    | 98.9 (89.0)            | 100 (100)              | 98.4 (95.8)            | 99.9 (97.6)            |
| Total reflections                                   | 1,579,824              | 1,911,199              | 2,333,791              | 1,856,431              |
| Unique Reflections                                  | 39,401 (1745)          | 44,346 (2187)          | 61,648 (2969)          | 24,158 (914)           |
| Redundancy                                          | 17.5 (11.7)            | 17.6 (10.9)            | 6.2 (5.0)              | 20.2 (14.1)            |
| <b>Refinement</b>                                   |                        |                        |                        |                        |
| Resolution (Å)                                      | 45.20-2.04             | 44.95-1.96             | 49.85-2.12             | 49.51-3.11             |
| <i>R</i> <sub>work</sub> / <i>R</i> <sub>free</sub> | 0.195/0.221            | 0.169/0.205            | 0.193/0.221            | 0.198/0.250            |
| No. atoms                                           |                        |                        |                        |                        |
| Protein                                             | 3430                   | 3484                   | 6913                   | 6512                   |
| Average B-factors (Å <sup>2</sup> )                 | 45.0                   | 37.0                   | 54.0                   | 98.0                   |
| r.m.s. deviations                                   |                        |                        |                        |                        |
| Bond length (Å)                                     | 0.002                  | 0.015                  | 0.003                  | 0.002                  |
| Bond angles (°)                                     | 0.457                  | 1.189                  | 0.593                  | 0.494                  |
| Ramachandran favored (%)                            | 98.14                  | 98.94                  | 96.53                  | 97.64                  |
| Ramachandran outliers (%)                           | 0                      | 0                      | 0                      | 0                      |
| PDB accession code                                  | 7L1B                   | 7L1C                   | 7RRG                   | 7L1D                   |

### Supplementary Table 3: Assessment of the cross-reactivity potential for TCR4.

| Gene                   | Taxonomy ID | Length | Position  | Sequence  |
|------------------------|-------------|--------|-----------|-----------|
| <i>PIK3CA</i> (H1047L) | n.a.        | 1068   | 1046-1054 | ALHGGWTTK |
| WT <i>PIK3CA</i>       | P42336      | 1068   | 1046-1054 | AHHGGWTTK |
| <i>TM87B</i>           | Q96K49      | 555    | 407-415   | IVFMGWTTK |

Derived from ScanProsite using the motif 'x-x-x-x-G-W-T-T-K'  
n.a. = not applicable



**Supplementary Table 4:** Overall efficiency of the SIFT-seq platform for retrieving Mut *PIK3CA* public neoantigen-specific TCRs.

| SIFT-seq run #                                 | Total number of T cells screened | HD Vs. Patient-derived | Functional TCR retrieved |
|------------------------------------------------|----------------------------------|------------------------|--------------------------|
| 1                                              | 1 x 10 <sup>7</sup>              | HD                     | No                       |
| 2                                              | 2 x 10 <sup>7</sup>              | HD                     | Yes                      |
| 3                                              | 2.2 x 10 <sup>7</sup>            | HD                     | Yes                      |
| 4                                              | 4.5 x 10 <sup>5</sup>            | HD                     | No                       |
| 5                                              | 4.5 x 10 <sup>5</sup>            | HD                     | Yes                      |
| 6                                              | 2.8 x 10 <sup>6</sup>            | HD                     | Yes                      |
| 7                                              | 1.6 x 10 <sup>6</sup>            | Patient                | Yes                      |
| Efficiency of TCR retrieval                    |                                  |                        | 5/7 = 71.4%              |
| # functional TCRs retrieved / T cells screened |                                  |                        | 1 / 1.1e <sup>7</sup>    |

**Supplementary Table 5:** Comparison of the SIFT-seq TCR discovery platform to other neoantigen and TCR discovery approaches.

| Reference                                    | Predicted Vs. empiric | Minimal peptide Vs. endogenous processing? | HLA-I Vs. HLA-II? | Screen for WT cross-reactivity? | Healthy donor Vs. patient-derived | Time to TCR retrieval |
|----------------------------------------------|-----------------------|--------------------------------------------|-------------------|---------------------------------|-----------------------------------|-----------------------|
| Wolfl et al., <i>Nat. Protoc.</i> , 2014     | Predicted             | Minimal peptide                            | HLA-I             | No                              | Healthy donor                     | 10-14 days            |
| Gee et al., <i>Cell</i> , 2018               | Empiric               | Minimal peptide                            | HLA-I             | Yes                             | Patient-derived                   | N.A.                  |
| Ali et al., <i>Nat. Protoc.</i> , 2019       | Predicted             | Endogenous                                 | HLA-I             | No                              | Healthy donor                     | 2-6 weeks             |
| Peng et al., <i>Cell Rep.</i> , 2019         | Predicted             | Minimal peptide                            | HLA-I             | No                              | Patient-derived                   | 2 days – 4 weeks      |
| Arnaud et al., <i>Nat Biotechnol.</i> , 2021 | Empiric               | Endogenous                                 | Both              | No                              | Patient-derived                   | N.D.                  |
| SIFT-seq                                     | Empiric               | Endogenous                                 | Both              | Yes                             | Healthy donor and patient-derived | 14 days               |

N.A. = not applicable  
N.D. = not described
